# Supplementary material
Source: Elsevier journal article supplement (https://rcastoragev2.blob.core.windows.net/6adabee77b4cfa318259bdfe2b3a7bff/mmc1.pdf)
Supplement: mmc1 [file mmc1.pdf]

**Supplemental Information**

***Citrobacter rodentium* Subverts ATP Flux  
and Cholesterol Homeostasis  
in Intestinal Epithelial Cells *In Vivo***

**Cedric N. Berger, Valerie F. Crepin, Theodoros I. Roumeliotis, James C. Wright, Danielle Carson, Meirav Pevsner-Fischer, R. Christopher D. Furniss, Gordon Dougan, Mally Dori-Bachash, Lu Yu, Abigail Clements, James W. Collins, Eran Elinav, Gerald J. Larrouy-Maumus, Jyoti S. Choudhary, and Gad Frankel**

## Supplementary figure and tables

**Figure S1. Relative abundance of metabolic proteins (related to Figure 2A, 2D, 3A, 5A, 5B, 6A and 6C).**

Bar plots showing the relative abundance of the individual proteins: **A.** mitochondrial membrane proteins (related to Figure 2A), **B.** TCA cycle (related to Figure 2D), **C.** cardiolipin biosynthesis (related to Figure 3A), **D.** Glycolysis (related to Figure 5A), **E.** creatine biosynthesis (related to Figure 5B), **F.** AMPK pathway (related to Figure 6A) and **G.** cholesterol biosynthesis (related to Figure 6C). Proteins below the significant value ( $\log_2FC > 0.59$  or  $< -0.59$ ) are shown in a lighter shade.

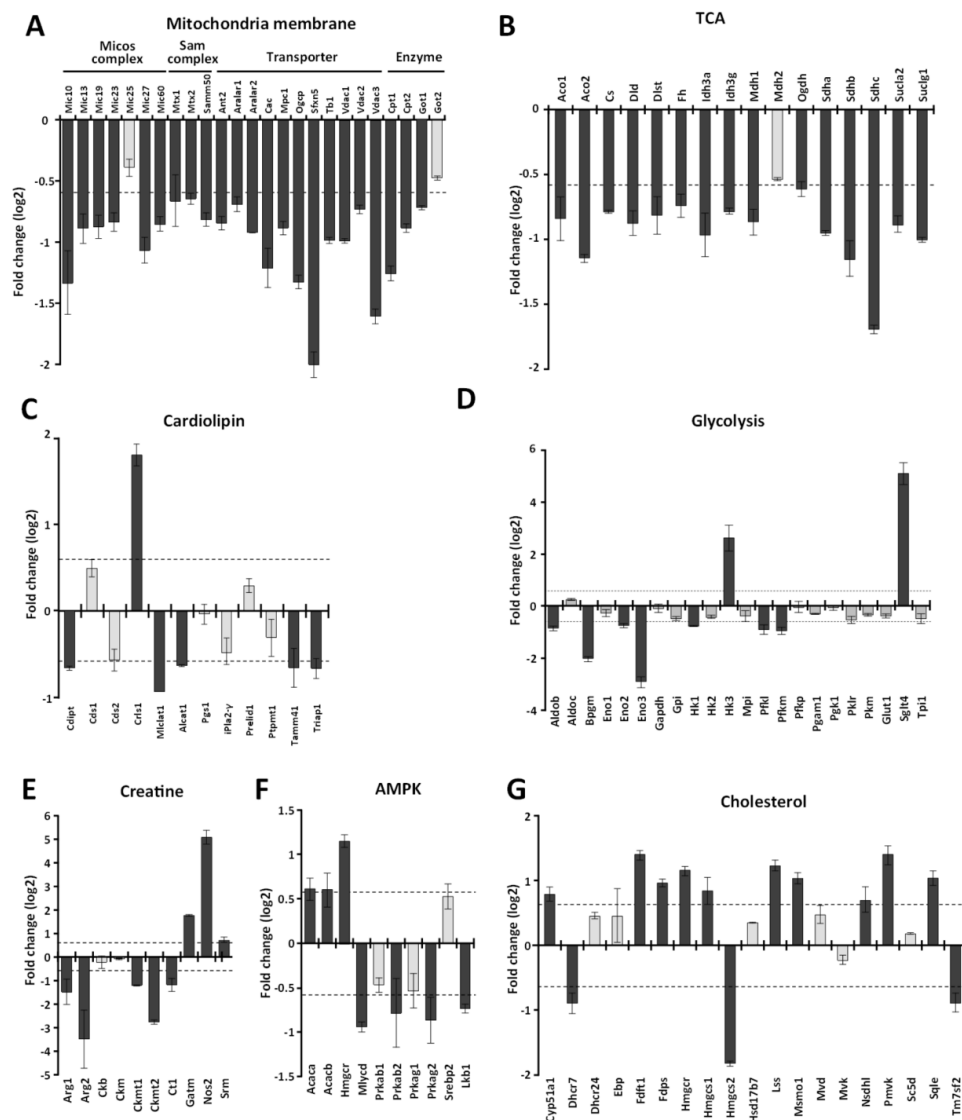

**Figure S2. *C. rodentium* impacts  $\beta$ -oxidation (related to Figure 2A).**

Schematic representation of the  $\beta$ -oxidation cycle, with the affected proteins during infection (related to Figure 2A). The bar plot shows the relative abundances of the individual proteins. Proteins below the significant value ( $\log_2\text{FC} > 0.59$  or  $< -0.59$ ) are shown in a lighter shade.

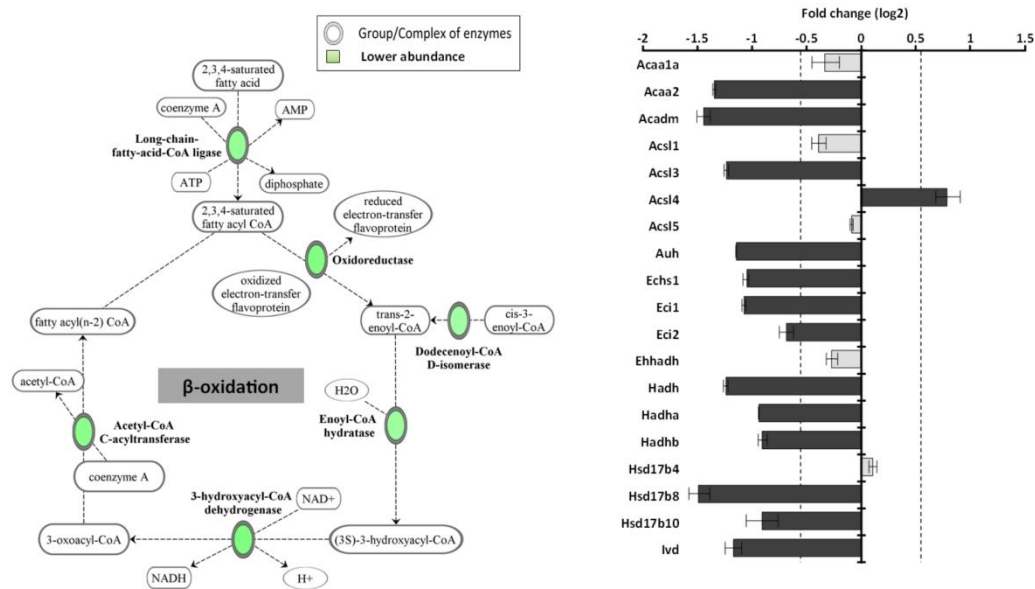

**Figure S2**

**Figure S3. *C. rodentium* impacts lipid elongation (related to Figure 3B).**

Schematic representation of lipid elongation and phosphatidic acid production, with the affected proteins during infection (related to Figure 3B). The bar plot shows the relative abundances of the individual enzymes. Proteins below the significant value ( $\log_2FC > 0.59$  or  $< -0.59$ ) are shown in a lighter shade.

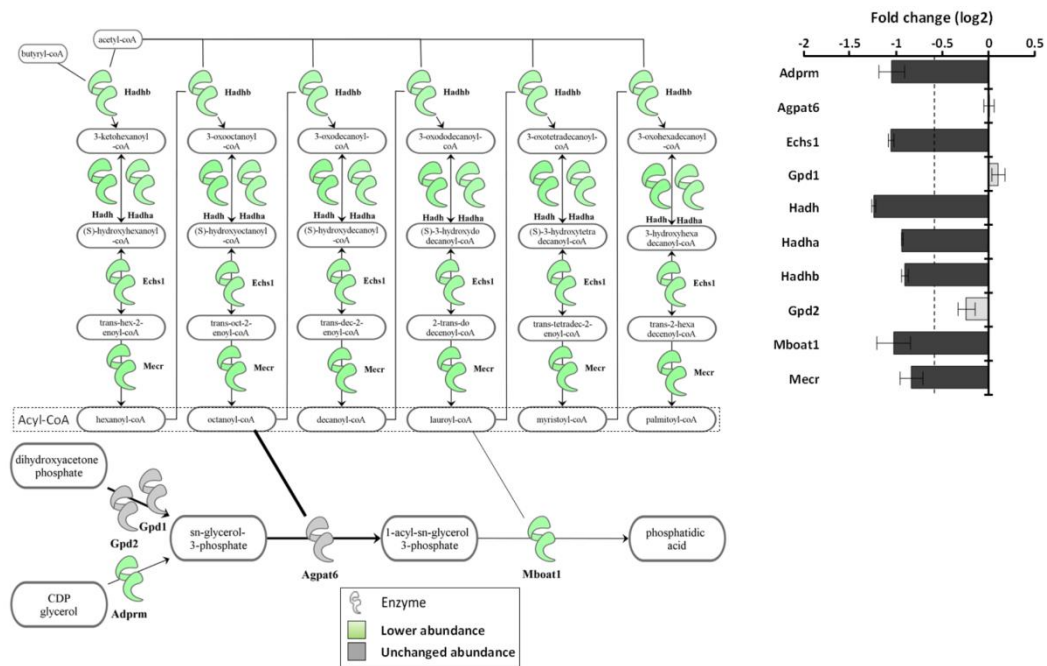

**Figure S3**

**Figure S4. Lipid profile of *C. rodentium* (related to Figure 3B).**

**A.** MALDI-TOF negative ion mass spectra of *C. rodentium*. The absolute abundance of the ions is shown on the y axis, and the masses of the ions are shown on the x axis. The m/z represents mass to charge ratio. **B.** Relative abundance of phosphatidylinositol detected in uninfected and infected IECs. Mann-Whitney test with p-value < 0.05. Each dot represents an individual mouse and bars the geometrical mean. Both panels are related to Figure 3B.

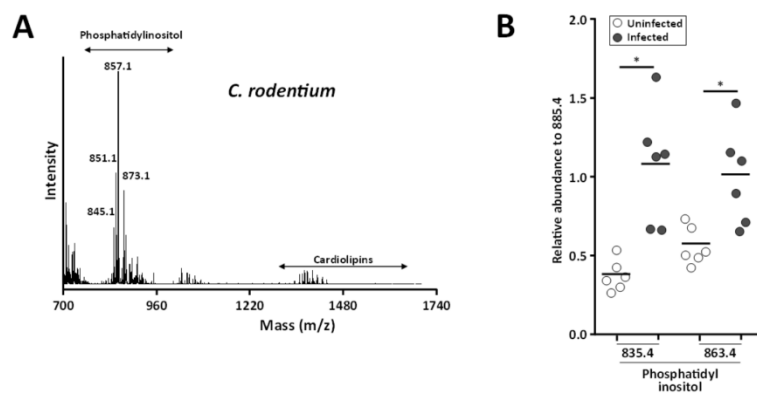

Figure S4

**Figure S5. Alpha diversity of tissue-associated microbiota on day 8 p.i (related to Figure 7).** Each dot represents and individual mouse and bars the mean.

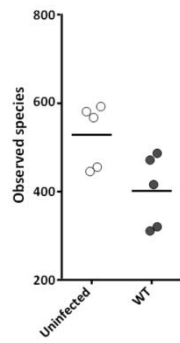

**Figure S5**

**Table S1. List of strains (related to EXPERIMENTAL MODEL)**

| Strains                            | Characteristics                                              | Resistance                         | Source                   |
|------------------------------------|--------------------------------------------------------------|------------------------------------|--------------------------|
| <i>C. rodentium</i> ICC169         | Wild type <i>C. rodentium</i>                                | Nal <sup>R</sup>                   | Schauer and Falkow, 1993 |
| <i>C. rodentium</i> ICC180         | <i>C. rodentium</i> ICC169:: <i>Lux</i>                      | Nal <sup>R</sup> /Kan <sup>R</sup> | Wiles et al., 2004       |
| <i>C. rodentium</i> ICC1411        | <i>C. rodentium</i> ICC180 $\Delta$ <i>map</i>               | Nal <sup>R</sup> /Kan <sup>R</sup> | This study               |
| <i>C. rodentium</i> ICC1412        | <i>C. rodentium</i> ICC180 $\Delta$ <i>map</i> :: <i>map</i> | Nal <sup>R</sup> /Kan <sup>R</sup> | This study               |
| <i>E. coli</i> CC118 $\lambda$ pir | $\lambda$ pir lysogen of <i>E. coli</i> CC118                | -                                  | Herrero et al., 1990     |
| <i>E. coli</i> CC1047              | Wild type helper <i>E. coli</i> strain                       | -                                  | Kaniga et al., 1991      |

**Table S2. List of plasmid (related to Generation of *C. rodentium* *map* mutant)**

| Plasmids              | Characteristics                                                                              | Resistance      | Source                     |
|-----------------------|----------------------------------------------------------------------------------------------|-----------------|----------------------------|
| pSEVA612S- <i>map</i> | pSEVA612S containing <i>map</i> plus 300bp upstream and downstream                           | Gm <sup>R</sup> | pICC2536                   |
| pSEVA612S- <i>HR</i>  | pSEVA612S containing 300bp upstream and downstream of <i>map</i> , without <i>map</i> itself | Gm <sup>R</sup> | pICC2537                   |
| pACBSR                | Plasmid containing the endonuclease I-SceI                                                   | Sm <sup>R</sup> | Ruano-Gallego et al., 2015 |
| pRK2013               | Self-transmissible plasmid able to promote conjugal transfer of DNA                          | Kn <sup>R</sup> | Figurski et al., 1979      |

**Table S3. List of primers (related to Generation of *C. rodentium* map mutant)**

| <b>Primer</b> | <b>Direction</b> | <b>Sequence 5'-3'</b>                                       | <b>Enzyme</b> | <b>Template</b>       | <b>Amplicon</b>                           | <b>Vector</b> |
|---------------|------------------|-------------------------------------------------------------|---------------|-----------------------|-------------------------------------------|---------------|
| DC074         | Forward          | TACTGCATGC TGT GCA<br>AGA TCT GTG AGA AAT<br>TGT TCA TTC AT | SphI          | gDNA Map              | Map + 300bp<br>upstream and<br>downstream | pSEVA         |
| DC075         | Reverse          | TACTGAGCTC TTT ATA<br>TTG TTA TGA TGC AAC<br>GGT ATG CAG TC | SacI          | gDNA Map              | Map + 300bp<br>upstream and<br>downstream | pSEVA         |
| DC084         | Forward          | ATAGAAAAAACATACC<br>AAGCATTTCTCGGT                          | -             | Conjugation<br>colony | Map + 500bp<br>upstream and<br>downstream | -             |
| DC085         | Reverse          | CAGGGGAGAAAATAAT<br>AAACGAGATCC                             | -             | Conjugation<br>colony | Map + 500bp<br>upstream and<br>downstream | -             |
